1 **CD4 T-cell transcriptome expression reversal of the lncRNA-mRNA**  
2 **co-expression network in elite controller vs. normal-process HIV**  
3 **patients**

4

5 Short title: LncRNA-mRNA co-expression network in patients with HIV

6

7 Chaoyu Chen<sup>1</sup>, Xiangyun Lu<sup>1</sup>, Nanping Wu<sup>1\*</sup>

8

9 <sup>1</sup>State Key Laboratory for Diagnosis and Treatment of Infectious Diseases,

10 Collaborative Innovation Center for Diagnosis and Treatment of Infectious Diseases,

11 The First Affiliated Hospital, School of Medicine, Zhejiang University, Hangzhou,

12 China

13 \*Corresponding Author

14

15 Chaoyu Chen ccy112359@163.com

16 Xiangyun Lu present81@163.com

17 Nanping Wu\* flwnp@zju.edu.cn

18

19

20 Keywords: Transcriptome, CD4 T-cell, network, elite controller, HIV

21

22

## 23 **Abstract**

24 Elite controller refers to a patient with human immunodeficiency virus infection with  
25 an undetected viral load without anti-viral treatment. Studies on gene expression and  
26 regulation in these individuals are limited but significant. We enrolled 196 patients  
27 and collected CD4 T-cell samples from two elite controllers, two normal-process  
28 infected patients, and two healthy controls to perform second-generation  
29 transcriptome sequencing. Using the Cuffdiff model, we identified differentially  
30 expressed mRNAs and long non-coding RNAs with corrected P value  $< 0.05$ , and  
31 constructed a protein-protein interaction network as well a long non-coding  
32 RNA-mRNA co-expression network based on the Pearson correlation coefficient.  
33 Interestingly, some interactions within the networks were identified as associated with  
34 viral infections and immune responses. This was the first study to examine gene  
35 transcription in elite controllers and to study their functional relationships. Our results  
36 provide a reference for subsequent functional verification at the molecular or cellular  
37 level.

38

## 39 **Author Summary**

40 Some individuals can spontaneously inhibit HIV replication after infection with HIV,  
41 and thus lack any symptoms. Studies on these patients, termed elite controllers (ECs)  
42 will help researchers and clinicians to understand the interrelationship between HIV  
43 and the host. In the present study, we focused on the interactions and functional  
44 relationships between significantly differentially expressed long non-coding RNAs

45 (lncRNAs) and mRNAs in ECs vs. normal-process patients (NPs). RNA-sequencing  
46 was performed for six representative samples of CD4 T-cells. Using the Pearson  
47 correlation test, an lncRNA-mRNA co-expression network was constructed. Several  
48 new regulatory relationships between transcripts were revealed that might be closely  
49 related to the ability of ECs to maintain a low viral load for long periods without  
50 anti-viral treatment. For example, lncRNA *C3orf35* was upregulated in ECs vs. NPs  
51 and was positively related to downregulation of *GNG2* mRNA (encoding G protein  
52 subunit gamma 2), which functions in chemokine signaling pathways and HIV-1  
53 infection. Overall, we identified certain interesting genetic interactions that will  
54 provide information about the mechanism of host suppression of viral replication.

55

## 56 **Introduction**

57 Human immunodeficiency virus (HIV) has been studied for more than 30 years, and  
58 research has found that HIV invades host CD4+ cells, integrates its own DNA into the  
59 host genome, and establishes a reservoir in the early stage, followed by massive  
60 replication, which destroys the normal immune system function of the host, and  
61 triggers various concurrent symptoms [1-2]. Ultimately, HIV infection can cause the  
62 host to die. Although anti retroviral therapy (ART) treatment can partially reconstitute  
63 the immune function of the host, it cannot eradicate the latent HIV pool in the host,  
64 which always maintains a low level of virus replication [3]. However, among  
65 HIV-infected individuals, a small number of patients are found to be inherently  
66 resistant to viral replication, and spontaneously induce suppression of the latent pools

67 without any anti-viral therapy, resulting in an undetectable viral load in plasma for a  
68 long period [4-5]. These patients, termed elite controllers (ECs), have attracted  
69 significant research interest. Studying the characteristics of the autoimmune factors of  
70 ECs is anticipated to identify important factors that control virus replication. Such  
71 valuable information could lead to novel methods to treat and alleviate HIV infection.  
72 Long-noncoding RNAs (lncRNAs) are transcribed RNA molecules greater than 200  
73 nt in length that regulate gene expression by diverse, but as yet not completely  
74 understood, mechanisms [6]. Although the function of most lncRNAs is unknown,  
75 several have been shown to regulate gene expression at multiple levels from DNA to  
76 phenotype [7]. Through a variety of means, including *cis* (near the site of lncRNA  
77 production) or *trans* (co-expressed with their target gene) mechanisms, lncRNAs play  
78 a vital role in many biological processes [8]. Studies on lncRNAs have become a  
79 hotspot in current non-coding RNA research.

80 Recent studies focused on the role of lncRNAs in HIV pathogenesis, especially the  
81 relationship between lncRNA regulation of gene expression and viral infection,  
82 replication, and latency [9-12]. A few lncRNAs have been characterized and proven  
83 to be closely associated HIV, for example, the knockdown of host lncRNA *NEATI*  
84 enhanced virus production by increasing nucleus-to-cytoplasm export of  
85 Rev-dependent instability element (INS)-containing HIV-1 mRNAs [13]. The  
86 knockdown of lncRNA *NRON* enhanced HIV-1 replication through increased activity  
87 of nuclear factor of activated T-cells (NFAT) and the viral long terminal repeat (LTR)  
88 [14]. Similarly, lncRNA *MALATI* releases epigenetic silencing of HIV-1 replication

89 by displacing the polycomb repressive complex 2 from binding to the LTR promoter  
90 [15]. Furthermore, an HIV-encoded antisense lncRNA, *ASP-L*, was proven to promote  
91 latency HIV [16-17]. Although, the mechanism of lncRNA function is sometimes  
92 elusory and unpredicted, many current studies, which are limited to the screening and  
93 functional prediction stage based on chip or sequencing results, also provide us with  
94 valuable information and a basis for mechanistic research.

95 In the present study, we conducted a transcriptomics investigation for HIV elite  
96 controllers, to identify differences in the transcriptional expression profiles between  
97 elite controllers and normal-process HIV patients as compared with healthy controls.  
98 The obtained lncRNA-mRNA co-expression network revealed the possible role of the  
99 functional relationships between lncRNAs and mRNAs in the ability of elite  
100 controllers to inhibit viral replication.

101

## 102 **Results**

### 103 **Subjects**

104 A total of 196 individuals infected with HIV were enrolled in our cohort, including  
105 patients under treatment (179, 91.3%), untreated normal-process patients (15,7.7%)  
106 and elite controllers (2, 1.0%). In addition, we recruited two healthy individuals from  
107 the out-patient department of the hospital. Most patients were infected with the virus  
108 through heterosexual contact, followed by intravenous infection, and homosexual  
109 transmission. Based on the basic principle of intra-group identity, we determined three  
110 men and three women who were assigned to each of the three study groups as study

111 subjects. Their ages ranged from 39 to 54 and were free of other diseases, such as  
112 tuberculosis, diabetes, or hepatitis. Specific details of the clinical characteristics of the  
113 participants are shown in S1 Table. Descriptive statistics are reported as counts  
114 (percentage) for dichotomous and categorical variables, and the median (the 25th  
115 percentile and 75th percentile) for continuous variables. The experimental design and  
116 analysis process of this research are shown in a flowchart (Fig 1).

117 **Identification of differentially expressed (DE) transcripts between health**  
118 **controls (HCs) and normal-process infected patients (NPs)**

119 First, we scanned the expression profiles of all transcripts in CD4 T-cells from two  
120 HCs, two ECs and two NPs. In all, more than 82000 mRNA transcripts and more than  
121 20000 corresponding genes were identified. Likewise nearly 15000 lncRNAs and  
122 1000 corresponding gene IDs were identified. Regular grouping between HCs and  
123 normal-process patients was first considered. Altogether, 3602 mRNA transcripts and  
124 383 lncRNA transcripts were differently expressed according to the threshold of fold  
125 change  $> 2$  and  $p$  value  $< 0.05$ , among which 2313 mRNAs and 207 lncRNAs were  
126 upregulated and 1289 mRNAs and 176 lncRNAs were downregulated. We similarly  
127 compared gene expression differences between HCs and ECs though more attention  
128 was paid to ECs vs. NPs. The comparison with HCs helped to provide a basic  
129 reference background. The lists of fragments per kilobase of transcript per million  
130 mapped reads (FPKM) values and regulatory situation of all DE mRNAs and  
131 lncRNAs in HCs vs. NPs and HCs vs. ECs are shown in S2 Table and S3 Table  
132 respectively.

### 133 **Identification of DE mRNAs between ECs and NPs**

134 Among all transcripts, 2936 transcripts were differentially expressed according to the  
135 threshold of fold change  $> 2$  and p value  $< 0.05$ . There were 1327 mRNAs that were  
136 upregulated and 1609 that downregulated in ECs vs. NPs. Gene ontology (GO) and  
137 Kyoto Encyclopedia of Genes and Genomes (KEGG) pathways analysis was carried  
138 out to annotate the function of these DE mRNAs. Certain terms and pathways that  
139 might be associated with infection and immunity were significantly enriched (S1 Fig).  
140 These terms and pathways included negative regulation of interferon-beta production  
141 (GO:0032688), cellular component disassembly involved in execution phase of  
142 apoptosis (GO:0006921), regulation of defense response to virus by virus  
143 (GO:0050690), negative regulation of type I interferon production (GO:0032480),  
144 RIG-I-like receptor signaling pathway (hsa04622), and antigen processing and  
145 presentation (hsa04612).

### 146 **Identification of DE lncRNAs between ECs and NPs**

147 As same, among all transcripts, 3543 official gene symbols that matched in the  
148 NONCODE database had corresponding lncRNA transcripts. Three main categories  
149 of lncRNAs accounted for the majority, including antisense lncRNAs (2537/14853,  
150 17.1%), intronic lncRNAs (8152/14853, 54.9%), and long intergenic noncoding  
151 RNAs (lincRNAs; 3344/14853, 22.5%). There were 151 upregulated lncRNAs and  
152 160 downregulated lncRNAs in ECs vs. NPs according to the threshold of fold change  
153  $> 2$  and p  $< 0.05$ . In both the mRNA and lncRNA clusters (Fig 2), the samples showed  
154 marked intra-group correlations and inter-group differences, which further confirmed

155 the specificity of the samples. In terms of protein-coding mRNAs encoding proteins  
156 with specific biological functions, the HC and EC groups showed closer clustering  
157 and were relatively distant from the NP group. The list of fragments per kilobase of  
158 transcript per million mapped reads (FPKM) values and regulatory situation of all DE  
159 mRNAs and lncRNAs are shown in S4 Table.

### 160 **PPI network of DE mRNAs**

161 Fig 3 shows the top 50 hub genes playing an important role in interaction of DE  
162 mRNAs, in which many genes functioned centrally and could be frequently regulated  
163 by other transcripts. Considering the differences in the outputs of different algorithms,  
164 we identified those genes that were commonly detected by the algorithms and focused  
165 on those genes that were regulated by lncRNAs and their functional enrichment  
166 analysis. S5 Table shows the intersection list of the top 50 hub-mRNAs calculated  
167 using 12 algorithms.

### 168 **LncRNA-mRNA co-expression network analysis**

169 Almost 0.9 million co-expression relationships were discovered, and the exact form  
170 was expressed as a linear orientation whereby one lncRNA targets one mRNA. In all  
171 orientations, 1109 DE lncRNAs targeting DE mRNAs were identified. Fig 4a shows  
172 the network constructed using these relationships, in which 142 DE lncRNAs were  
173 co-expressed with 127 DE mRNAs. Moreover, we found 16 of 24 intersecting hub  
174 mRNAs in the diagram, which helped us to quickly locate the target protein coding  
175 genes and easily access the enriched functions of these genes. Next, we selected 15  
176 annotated lncRNAs and their associated mRNAs from Fig 4a and constructed Fig 4b.



177 We then identified the top 10 GO terms and pathways most closely related to  
178 infection and immunity by combining the function of the hub genes. Many significant  
179 functions are co-enriched, such as immune response-regulating signaling pathway  
180 (GO:0002764) and apoptosis (hsa04215) (Fig 5).

### 181 **Immune regulation and infection associated lncRNA-mRNA networks**

182 We further investigated the specific functions of the co-expressed mRNAs shown in  
183 Fig 4b and found several interesting regulation relationships. Certain genes were  
184 enriched to GO terms and pathways that are closely related to immune regulation and  
185 infection. These genes and corresponding pathways included *GNG2* (Human  
186 cytomegalovirus infection, hsa05163; Chemokine signaling pathway, hsa04062;  
187 Kaposi sarcoma-associated herpesvirus infection, hsa05167; Human  
188 immunodeficiency virus 1 infection, hsa05170), *RFX5* (Primary immunodeficiency,  
189 hsa05340; Tuberculosis, hsa05152; Antigen processing and presentation, hsa04612),  
190 *HDAC6* (Viral carcinogenesis, hsa05203), *MAPK8* (Apoptosis - multiple species,  
191 hsa04215; NOD-like receptor signaling pathway, hsa04621; Fc epsilon RI signaling  
192 pathway, hsa04664; RIG-I-like receptor signaling pathway, hsa04622; Inflammatory  
193 mediator regulation of TRP channels, hsa04750; Toll-like receptor signaling pathway,  
194 hsa04620), *MAPK4* (IL-17 signaling pathway, hsa04657), and *RARA* (Th17 cell  
195 differentiation, hsa04659). Corresponding lncRNAs including *C3orf35*,  
196 *TMEM254-AS1*, *ARRDC3-AS1*, *LINC00202-1*, *TRAF3IP2-AS1*, *PSMD5-AS1*,  
197 *AC093375.1*, and *SVIL-AS1* were co-expressed with these mRNAs, which suggested  
198 several new regulatory relationships that might play an important role in controlling

199 virus replication.

200

## 201 **Dicussion**

202 In the present study, we systematically analyzed the expression profiles of lncRNAs  
203 and mRNAs from CD4<sup>+</sup> T cells from ECs, NPs, and HCs, and constructed a  
204 co-expression network based on the relationships among DE genes and database  
205 annotations. The functions of most lncRNAs are not well characterized; therefore, the  
206 gene functions in this research mainly referred to those of mRNAs and their  
207 expression products. The potential functions of candidate lncRNAs and the  
208 lncRNAs-associated biological processes in ECs were predicted using the  
209 lncRNA-mRNA network and functional enrichment analysis. We identified certain  
210 genes that play a significant role in the ability of ECs to inhibit the replication of  
211 latent virus. Most of these genes were downregulated in the HCs and ECs and  
212 upregulated in the NPs, which was consistent with their clinical characteristics, in that  
213 ECs maintain a similar gene expression pattern to the HCs, which distinguishes them  
214 from the NPs. Among these rigorously selected genes, some hub genes were closely  
215 related to microbial infections and host immune processes, which are reported to  
216 greatly affect the progress of HIV infection [18-19].

217 To the best of our knowledge, the present study was the first to predict  
218 lncRNA-mRNA interactions for HIV ECs, in which many of the reported genes had  
219 not been previously reported to function in HIV-associated biological process. The  
220 *MAPK* family has been associated with the reactivation and replication of the virus in

221 many studies [20-21], and the HIV-1 virus inhibition activity of MAPK pathway  
222 inhibitors was the result of the negative regulation of HIV-1 LTR promoter activity  
223 [22]. In addition, HDAC6 gene expression product was reported to mediate HIV-1  
224 tat-induced proinflammatory responses by regulating the MAPK-NF-kappaB/AP-1  
225 pathways in astrocytes [23]. In the present study, we also found that HDAC6 interacts  
226 with MAPK8, MAPK4, and MAPK9 (Fig 3). This suggested their related lncRNAs  
227 including *C3orf35*, *TMEM254-AS1*, *ARRDC3-AS1*, *LINC00202-1*, *TRAF3IP2-AS1*,  
228 *PSMD5-AS1*, and *AC093375.1* may control HIV replication by regulating the  
229 expression of these genes. In addition, we identified genes that had not been studied  
230 before, whose functions were enriched into the following processes: Virus infection,  
231 immunodeficiency, apoptosis, and cytokines. Previous studies had shown that these  
232 functions are closely related to viral replication [24-25]. For instance, *GNG2*  
233 (encoding G protein subunit gamma 2) showed a strong correlation with HIV in the  
234 KEGG pathway analysis. In Kaposi sarcoma-associated herpesvirus infection, *GNG2*  
235 activates Ras pathways and PI3K-Akt pathways to affect the production of cellular  
236 cytokines such as IL-6, IL-8, VEGF, and COX2, and other inflammatory and cellular  
237 life cycle-related biological processes. HIV infection and its concurrent Kaposi  
238 sarcoma are also closely related to the occurrence of other cancers [26-27].  
239 ART treatment cannot eradicate the latent virus in the host; therefore, the genes  
240 identified in the present study may play a non-negligible regulatory role in the  
241 relationship between the latent virus and the host. Latent virus is the biggest obstacle  
242 to the elimination of the disease; thus, understanding the processes that contribute to

243 its persistence, such as inflammation and immune activation, are crucial for the  
244 remission and cure of HIV [28-29].

245 There are also some limitations to this study. First, because of the limited amount of  
246 RNA in the samples, the sample size of this study was relatively small. Although we  
247 selected eight genes for verification using qRT-PCR in 12 samples and found that the  
248 expression trends of four of them were consistent with the RNA sequencing results,  
249 these results are not statistically significant because of the small sample size. Second,  
250 we only assessed gene expression of CD4+ T cells, which, although they are the main  
251 targets of HIV, are only one of the many cell types that are infected by HIV. Further  
252 research should be performed to validate the function and mechanism of the genes in  
253 a larger sample and in more cell types.

254 In summary, this study identified several important differentially expressed genes  
255 associated with the EC phenomenon, which could form the basis for subsequent  
256 cellular and molecular studies, and could provide new targets for gene-targeted  
257 therapy in the future.

258

## 259 **Methods**

### 260 **Ethics statement**

261 All participating medical institutions provided local institutional review board  
262 approval, and the participants provided informed consent for this study.

### 263 **Cohort and patients**

264 In total, 196 patients were recruited into our cohort, from different provinces of

265 China, who were diagnosed in Qingchun Hospital of Zhejiang Province from January  
266 2000 to January 2018, and received or voluntarily rejected highly active antiretroviral  
267 therapy (HAART) treatment. The viral loads of the patients were detected using the  
268 Cobas Taqman system (Roche). The HCs were randomly selected from hospital  
269 clinics and were not suffering from any diseases. We chose two ECs, two NPs, and  
270 two HCs of similar ages, gender, and traditional risk factors to perform second  
271 generation transcriptome sequencing. ECs were defined as HIV-infected patients with  
272 and undetectable viral load without any anti-viral treatment for nearly 10 years.

### 273 **Sample collection and preparation**

274 Peripheral blood mononuclear cells (PBMCs) were isolated from 3–5 mL EDTA-K2+  
275 anticoagulant venous blood using density gradient centrifugation. Primary CD4+ T  
276 cells were purified through negative selection using a CD4+ T cell isolation Kit  
277 (Miltenyi). According to flow cytometry analysis, the purity of the separated CD4+ T  
278 cells was more than 90%. Total RNA was extracted using the TRIzol reagent (Life  
279 Technologies). RNA purity was checked using a NanoPhotometer®  
280 spectrophotometer (IMPLEN). The RNA concentration was measured using a Qubit®  
281 RNA Assay Kit in Qubit® 2.0 Fluorometer (Life Technologies) and its integrity was  
282 assessed using an RNA Nano 6000 Assay Kit for the Bioanalyzer 2100 system  
283 (Agilent Technologies).

### 284 **RNA library construction and RNA sequencing**

285 Ribosomal RNA was removed using a Epicentre Ribo-zero™ rRNA Removal Kit  
286 (Epicentre), and the rRNA free residue was cleaned up using ethanol precipitation.

287 Subsequently, sequencing libraries were generated using the rRNA depleted RNA by  
288 NEBNext® Ultra™ Directional RNA Library Prep Kit for Illumina® (NEB)  
289 following manufacturer's recommendations. After cDNA synthesis and purification,  
290 clustering of the index-coded samples was performed on a cBot Cluster Generation  
291 System using a TruSeq PE Cluster Kit v3-cBot-HS (Illumina) according to the  
292 manufacturer's instructions. The libraries were then sequenced on an Illumina Hiseq  
293 4000 platform and raw data were generated.

#### 294 **RNA sequencing analysis**

295 Clean data were obtained by removing reads containing adapters, reads only  
296 containing poly-N, and low quality reads from the raw data. After quality control,  
297 paired-end clean reads were aligned to the reference genome downloaded from  
298 website using HISAT2 (v2.0.4). Cuffdiff (v2.1.1) was used to calculate the FPKM  
299 values of both lncRNAs and mRNAs in each sample [30]. Gene FPKM values were  
300 computed by summing the FPKM values of transcripts in each gene group. The  
301 Cuffdiff model provides statistical routines to determine differential expression in the  
302 digital transcript or gene expression data using a model based on the negative  
303 binomial distribution. Transcripts with a corrected P value < 0.05 were assigned as  
304 differentially expressed. We plotted a heatmap to observe the clustering between the  
305 samples and the genes using Multi Experiment Viewer (v4.9.0).

#### 306 **LncRNA-mRNA co-expression network analysis**

307 *Trans* role is lncRNA binding to target DNA as a RNA:DNA heteroduplex, as  
308 RNA:DNA:DNA triplex, or RNA recognition of specific chromatin-like complex

309 surfaces[31]. We calculated the expression correlation between lncRNAs and mRNAs  
310 using the Pearson correlation test for target gene prediction and the results were  
311 expressed as Pearson correlation coefficients. To narrow the scope of investigation  
312 and the number of genes, we first assessed the interaction among all DE mRNAs  
313 using the STRING database (v11.0) and constructed a PPI network using the Hubba  
314 package in Cytoscape (v3.7.1). After considering 12 synthetic algorithms, the  
315 intersection of the top 50 genes yielded 24 hub genes, which occupy a central position  
316 in the network of all DE mRNAs. After identifying and retaining the DE mRNAs and  
317 lncRNAs in all lncRNA-mRNA relations, we screened 1109 pairs of exact  
318 relationships between the two groups and constructed a co-expression network based  
319 on the Pearson relation coefficient (all > 0.95). Then, we identified the annotated  
320 lncRNAs and associated mRNAs for further functional enrichment analysis. PPI and  
321 lncRNA-mRNA network diagrams were also drawn using the Cytoscape software.

### 322 **Gene ontology and KEGG pathways analysis**

323 By jointly using the David database (v6.8) and KOBAS database (v3.0), gene GO  
324 enrichment and KEGG pathways analysis of all DE mRNAs and DE lncRNA  
325 co-expressed DE mRNAs were implemented to interpret the biological meaning of the  
326 transcripts. GO terms and KEGG pathways with corrected P values less than 0.05  
327 were considered significantly enriched by the differentially expressed RNAs.

328

### 329 **Acknowledgements**

330 We would like to thank all of the participants in the cohort. In addition, we would like  
331 to thank the native English speaking scientists of Elixigen Company (Huntington  
332 Beach, California) for editing our manuscript.

333

### 334 **Author Contributions**

335 Chaoyu Chen and Nanping Wu were involved in the conception and design of the  
336 study. Chaoyu Chen and Xiangyun Lu were involved in sample preparation, data  
337 acquisition, and organization. Chaoyu Chen conducted the data analysis, and all  
338 authors were responsible for data interpretation. Chaoyu Chen was the major  
339 contributor to the writing of the manuscript. All authors read and approved the final  
340 manuscript.

### 341 **Competing interests**

342 The authors declare that they have no competing interests.

343

### 344 **Funding**

345 This study was supported in part by grants from the Mega-Project for National  
346 Science and Technology Development under the "Study on comprehensive prevention  
347 and treatment of AIDS in demonstration areas, 13th, Five-Year Plan of China"  
348 (NO.2017ZX10105001-005) and "Research and application of appropriate treatment  
349 and prevention strategies for children with AIDS, 13th, Five-Year Plan of China"  
350 (NO.2018ZX10302-102). The funders had no role in study design, data collection and



351 analysis, decision to publish, or preparation of the manuscript.

352

## 353 **References**

354 1. Lee C A. The natural history of HIV infection. *Aids*, 2013, 1(2):177-179.

355 2. Eisele E, Siliciano RF. Redefining the viral reservoirs that prevent HIV-1  
356 eradication. *Immunity* 37(3), 377 – 388 (2012).

357 3. Murray A J, Kwon K J, Farber D L, et al. The Latent Reservoir for HIV-1: How  
358 Immunologic Memory and Clonal Expansion Contribute to HIV-1 Persistence. *The*  
359 *Journal of Immunology*, 2016, 197(2):407-417.

360 4. Long-term nonprogressive disease among untreated HIV-infected individuals:  
361 clinical implications of understanding immune control of HIV. *JAMA* 304(2),  
362 194 – 201 (2010).

363 5. Gonzalozgil E, Ikediobi U, Sutton R E. *Focus: Infectious Diseases: Mechanisms of*  
364 *Virologic Control and Clinical Characteristics of HIV+ Elite/Viremic Controllers.*  
365 *Yale J Biol Med*, 2017, 90(2):245-259.

366 6. Wilusz, J.E., Sunwoo, H., and Spector, D.L. (2009). Long noncoding RNAs:  
367 functional surprises from the RNA world. *Genes Dev.* 23, 1494 – 1504.

368 7. Wapinski, O., and Chang, H.Y. (2011). Long noncoding RNAs and human disease.  
369 *Trends Cell Biol.* 21, 354 – 361.

370 8. Wang, K. C. & Chang, H. Y. Molecular Mechanisms of Long Noncoding RNAs.  
371 *Mol. Cell* 43, 904 – 914 (2011).

372 9. Trypsteen W, Mohammadi P, Van Hecke C, et al. Differential expression of

- 373 lncRNAs during the HIV replication cycle: an underestimated layer in the HIV-host  
374 interplay. *Scientific Reports*, 2016, 6:36111.
- 375 10. Lazar D C, Morris K V, Saayman S. The emerging role of long non-coding RNAs  
376 in HIV infection. *Virus Research*, 2015:S0168170215300277.
- 377 11. Saayman S, Ackley A, Turner A M W, et al. An HIV-Encoded Antisense Long  
378 Noncoding RNA Epigenetically Regulates Viral Transcription. *Molecular Therapy*,  
379 2014, 22(6):1164-1175.
- 380 12. Nair M, Sagar V, Pilakka-Kanthikeel S. Gene-expression reversal of lncRNAs and  
381 associated mRNAs expression in active vs latent HIV infection. *Scientific Reports*,  
382 2016, 6:34862.
- 383 13. Zhang Q H, Chen C Y, Yedavalli V S R K, et al. NEAT1 Long Noncoding RNA  
384 and Paraspeckle Bodies Modulate HIV-1 Posttranscriptional Expression. *Mbio*, 2013,  
385 4(1):00596-12.
- 386 14. Imam, H., Shahr Bano, A., Patel, P., Holla, P. & Jameel, S. The lncRNA NRON  
387 modulates HIV-1 replication in a NFAT-dependent manner and is differentially  
388 regulated by early and late viral proteins. *Sci. Rep.* 5, 8639 (2015).
- 389 15. Qu Di, Sun Wei-Wei, Li Li et al. Long noncoding RNA MALAT1 releases  
390 epigenetic silencing of HIV-1 replication by displacing the polycomb repressive  
391 complex 2 from binding to the LTR promoter. *Nucleic Acids Res.*, 2019.
- 392 16. Kobayashi-Ishihara, M. et al. HIV-1-encoded antisense RNA suppresses viral  
393 replication for a prolonged period. *Retrovirology* 9, 38 (2012)
- 394 17. Saayman, S. et al. An HIV-Encoded Antisense Long Noncoding RNA

- 395 Epigenetically Regulates Viral Transcription. *Mol. Ter.* 22, 1164 – 1175 (2014).
- 396 18. Bell L C K, Noursadeghi M. Pathogenesis of HIV-1 and Mycobacterium  
397 tuberculosis co-infection. *Nature Reviews Microbiology*, 2017.
- 398 19. Sumner R P, Thorne L G, Fink D L, et al. Are Evolution and the Intracellular  
399 Innate Immune System Key Determinants in HIV Transmission?. *Frontiers in*  
400 *Immunology*, 2017, 8:1246-.
- 401 20. Wang X, Sun B, Mbondji C, et al. Differences in Activation of HIV - 1  
402 Replication by Superinfection With HIV - 1 and HIV - 2 in U1 Cells. *Journal of*  
403 *Cellular Physiology*, 2016, 232(7).
- 404 21. Prasad S, Tyagi A K. Curcumin and its analogues: A potential natural compound  
405 against HIV infection and AIDS. *Food Funct.* 2015, 6(11):10.1039.C5FO00485C.
- 406 22. Gong J, Shen X H, Chen C, et al. Down-regulation of HIV-1 infection by  
407 inhibition of the MAPK signaling pathway. *Virologica Sinica*, 2011, 26(2):114-122.
- 408 23. Youn G S, Ju S M, Choi S Y, et al. HDAC6 mediates HIV-1 tat-induced  
409 proinflammatory responses by regulating MAPK-NF-kappaB/AP-1 pathways in  
410 astrocytes. *Glia*, 2015, 63(11):1953-1965.
- 411 24. Khan S Z, Hand N, Zeichner S L. Apoptosis-induced activation of HIV-1 in  
412 latently infected cell lines. *Retrovirology*, 12,1(2015-05-16), 2015, 12(1):42.
- 413 25. Jacobs E S, Keating S M, Abdel-Mohsen M, et al. Cytokines Elevated  
414 in HIV Elite Controllers Reduce HIV Replication In Vitro and Modulate HIV  
415 Restriction Factor Expression. *J Virol*, 2017 Feb 28;91(6).
- 416 26. Gonçalves PH, Uldrick T S, Yarchoan R. HIV-associated Kaposi sarcoma and

417 related diseases. AIDS, 2017:1.

418 27. Gonçalves P H, Ziegelbauer J, Uldrick T S, et al. Kaposi sarcoma  
419 herpesvirus-associated cancers and related diseases. Current Opinion in Hiv & Aids,  
420 2016, 12(1):47.

421 28. Dahabieh M S, Battivelli E, Verdin E. Understanding HIV Latency: The Road to  
422 an HIV Cure. Annual Review of Medicine, 2015, 66(1):407-421.

423 29. Massanella M, Fromentin R, Chomont N. Residual inflammation and viral  
424 reservoirs: alliance against an HIV cure. Curr Opin HIV AIDS 2016;11:234-241.

425 30. Trapnell C, Williams B A, Pertea G, et al. Transcript assembly and quantification  
426 by RNA-Seq reveals unannotated transcripts and isoform switching during cell  
427 differentiation. Nature Biotechnology, 2010, 28(5):511-515.

428 31. Hung T , Chang H Y . Long noncoding RNA in genome regulation. RNA  
429 Biology, 2010, 7(5):582-585.

### 430 **Supporting information**

431 **S1 Figure. Gene ontology (GO) terms and Kyoto Encyclopedia of Genes and**  
432 **Genomes (KEGG) pathways enrichment of all differentially expressed (DE)**  
433 **mRNAs.**

434 **S1 Table. Clinical characteristics of the participants.**

435 **S2 Table. Lists of differentially expressed (DE) mRNAs and long non-coding**  
436 **RNAs (lncRNAs) in health controls (HCs) vs. normal-process infected patients**  
437 **(NPs).**

438 **S3 Table. Lists of DE mRNAs and lncRNAs in HCs vs. elite controllers (ECs).**

439 **S4 Table. Lists of DE mRNAs and lncRNAs in ECs vs. NPs.**

440 **S5 Table. The intersection list of the top 50 hub-mRNAs calculated using 12**  
441 **algorithms.**

442

443 **Fig 1. Flowchart of the analysis procedure.** lncRNA, long non-coding RNA; EC,  
444 elite controller; NP, normal-process infected patient; DE, differentially expressed;  
445 GO, gene ontology; KEGG, Kyoto Encyclopedia of Genes and Genomes.

446

447 **Fig 2. Heatmaps of differentially expressed (DE) mRNAs and long non-coding**  
448 **RNAs (lncRNAs).**

449 Hierarchical clustering analysis of sequencing detected mRNAs and lncRNAs with  
450 their expression abundance. Patient groups are on the horizontal axis, and mRNA and  
451 lncRNA genes are grouped along the vertical axis. Pinkish-purple bars indicate  
452 increased abundance of the corresponding genes, and blue indicates decreased  
453 abundance. White bars indicate that the corresponding genes were not detected.

454

455 **Fig 3. Protein-protein interaction (PPI) network of differentially expressed (DE)**  
456 **mRNAs.**

457 Top 50 hub mRNAs were included in using EcCentricity algorithm. The intensity of  
458 the color indicates the density of the correlation. The closer to red, the more central  
459 the gene is. The size of the circle represents the significance of a gene.

460

461 **Fig 4. Long non-coding RNA (lncRNA)-mRNA co-expression network in elite**  
462 **controllers (ECs) and normal-process infected patients (NPs).** The network was  
463 based on the Pearson relation coefficient of an lncRNA targeting an mRNA. Round  
464 shapes correspond to mRNAs, and squares to lncRNAs. The size of the shape is  
465 positively related to the P value. Red means upregulation and green means  
466 downregulation. A solid line indicates a positive correlation and a dotted line indicates  
467 a negative correlation. All hub-mRNAs and annotated lncRNAs are tagged with large  
468 labels. (a) All lncRNAs and co-expressed mRNAs. (b) Annotated lncRNAs and  
469 co-expressed mRNAs.

470

471 **Fig 5. Gene ontology (GO) terms and Kyoto Encyclopedia of Genes and**  
472 **Genomes (KEGG) enrichment classification of the predicted targeting mRNAs of**  
473 **the long non-coding RNA (lncRNA)-mRNA network.** The 10 most significantly  
474 enriched KEGG pathways and the 10 most significantly enriched GO terms in the  
475 biological process, cellular components, and molecular function categories.

476

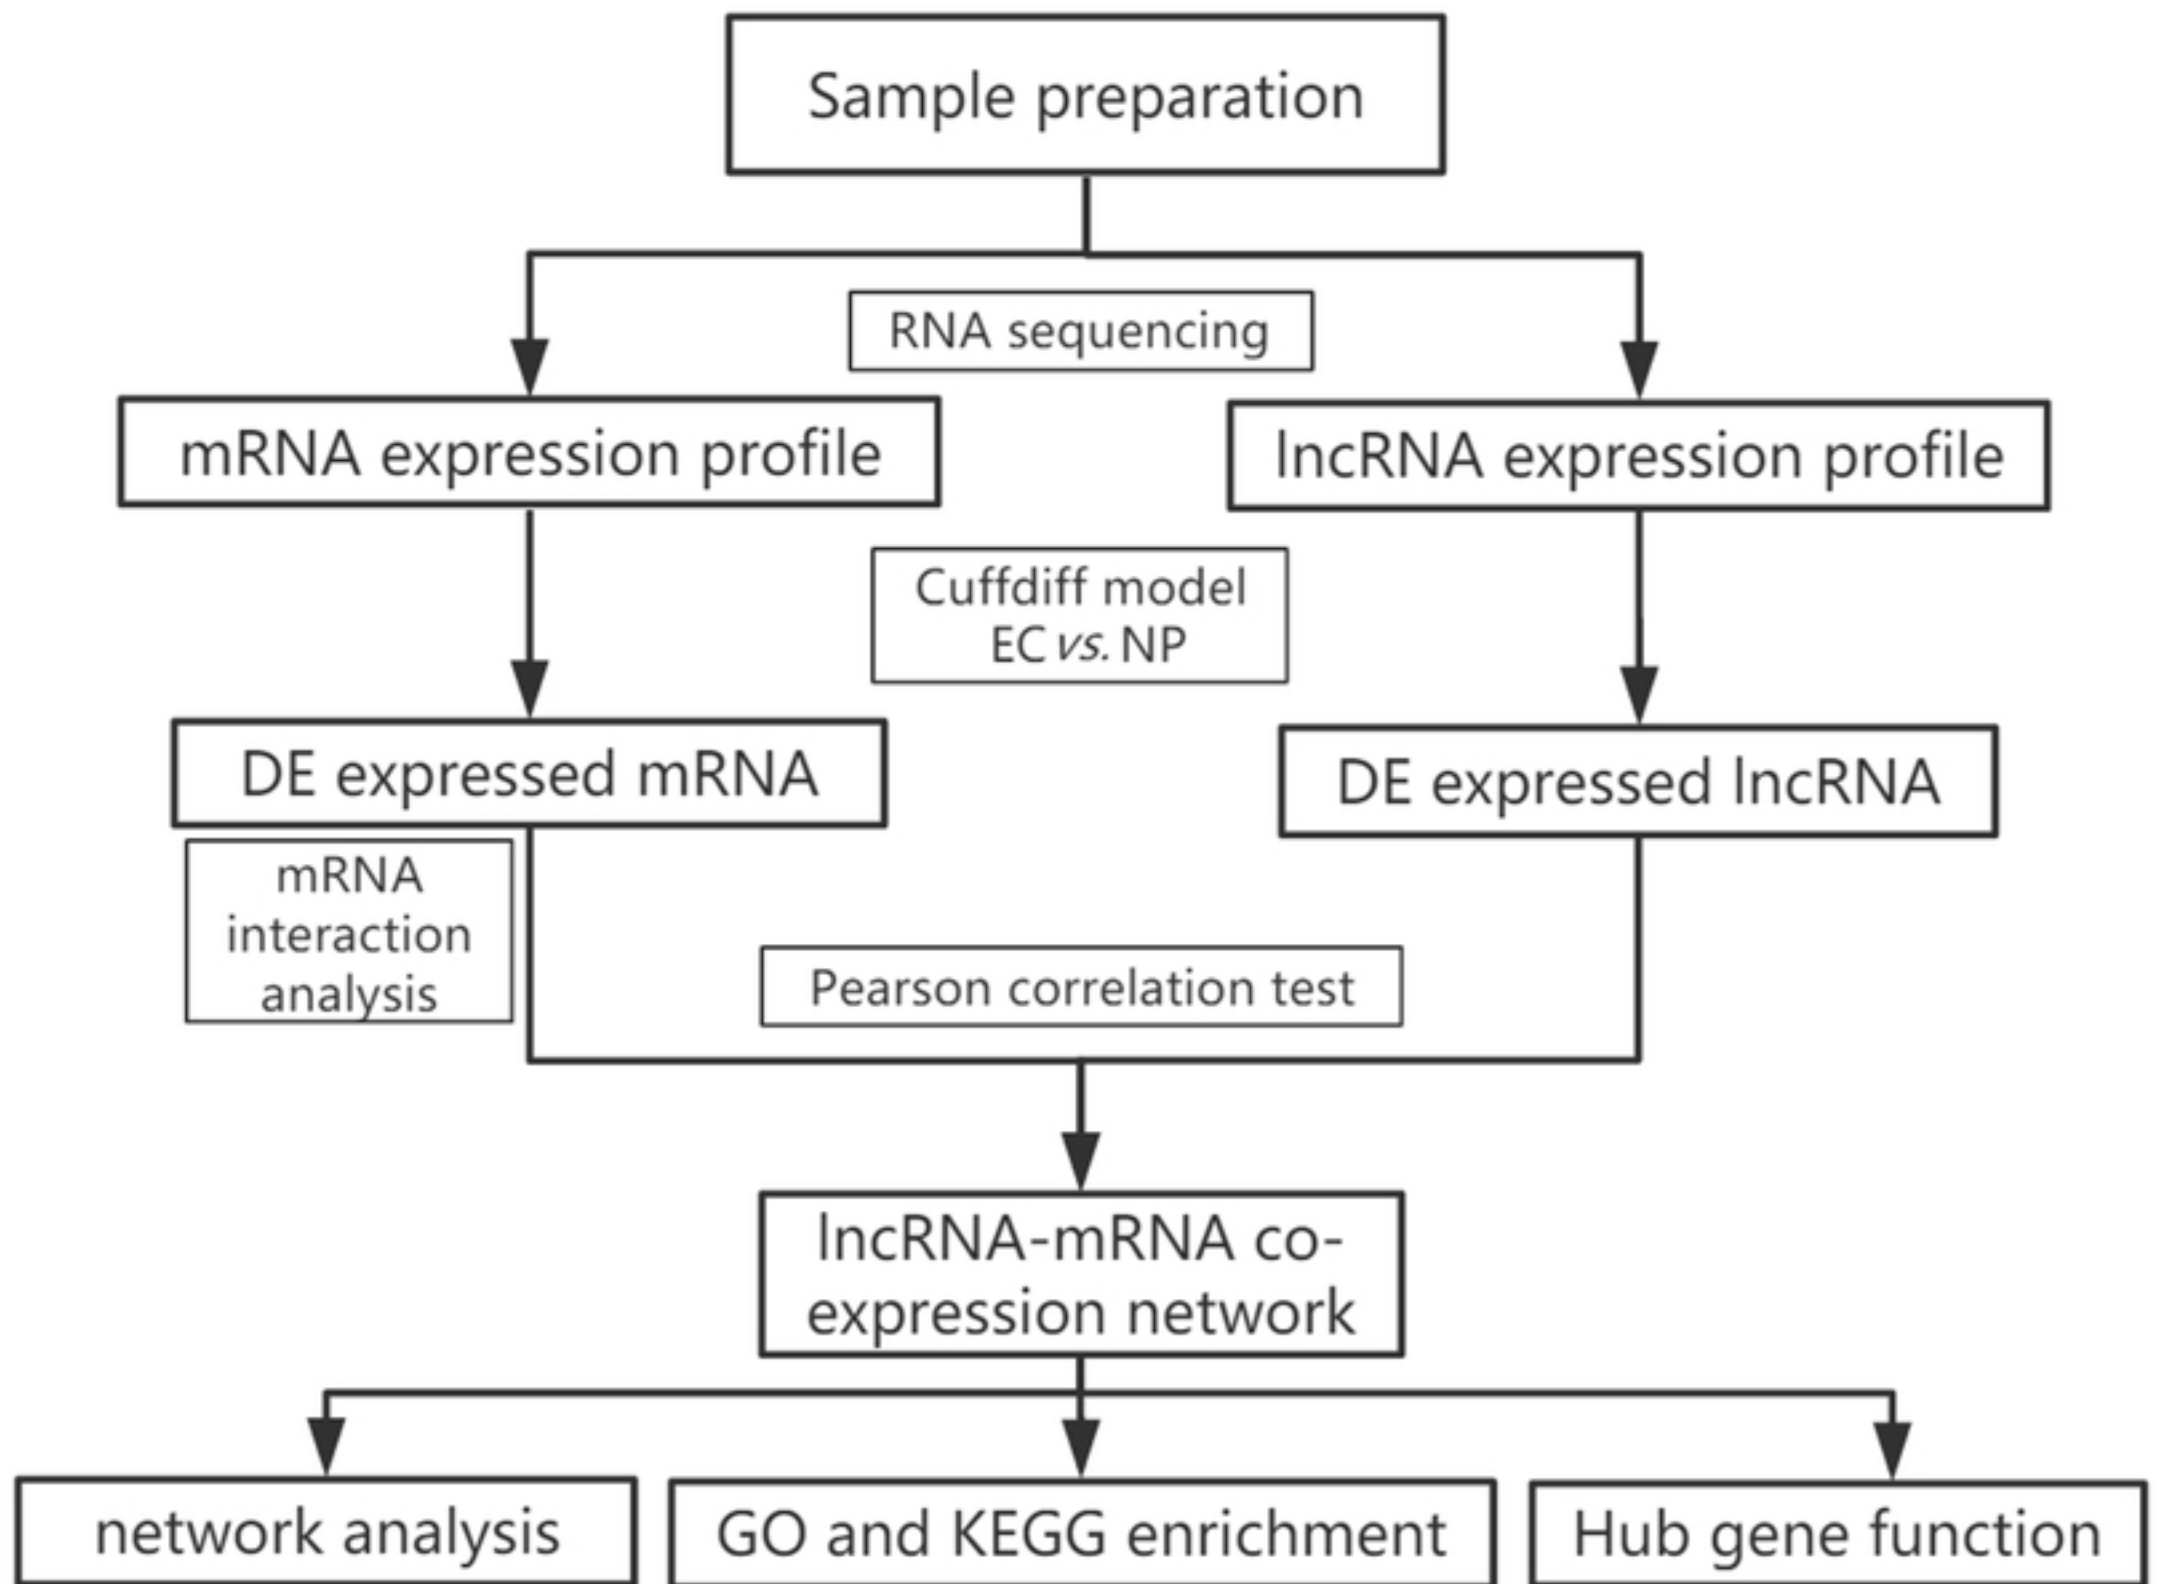

Figure

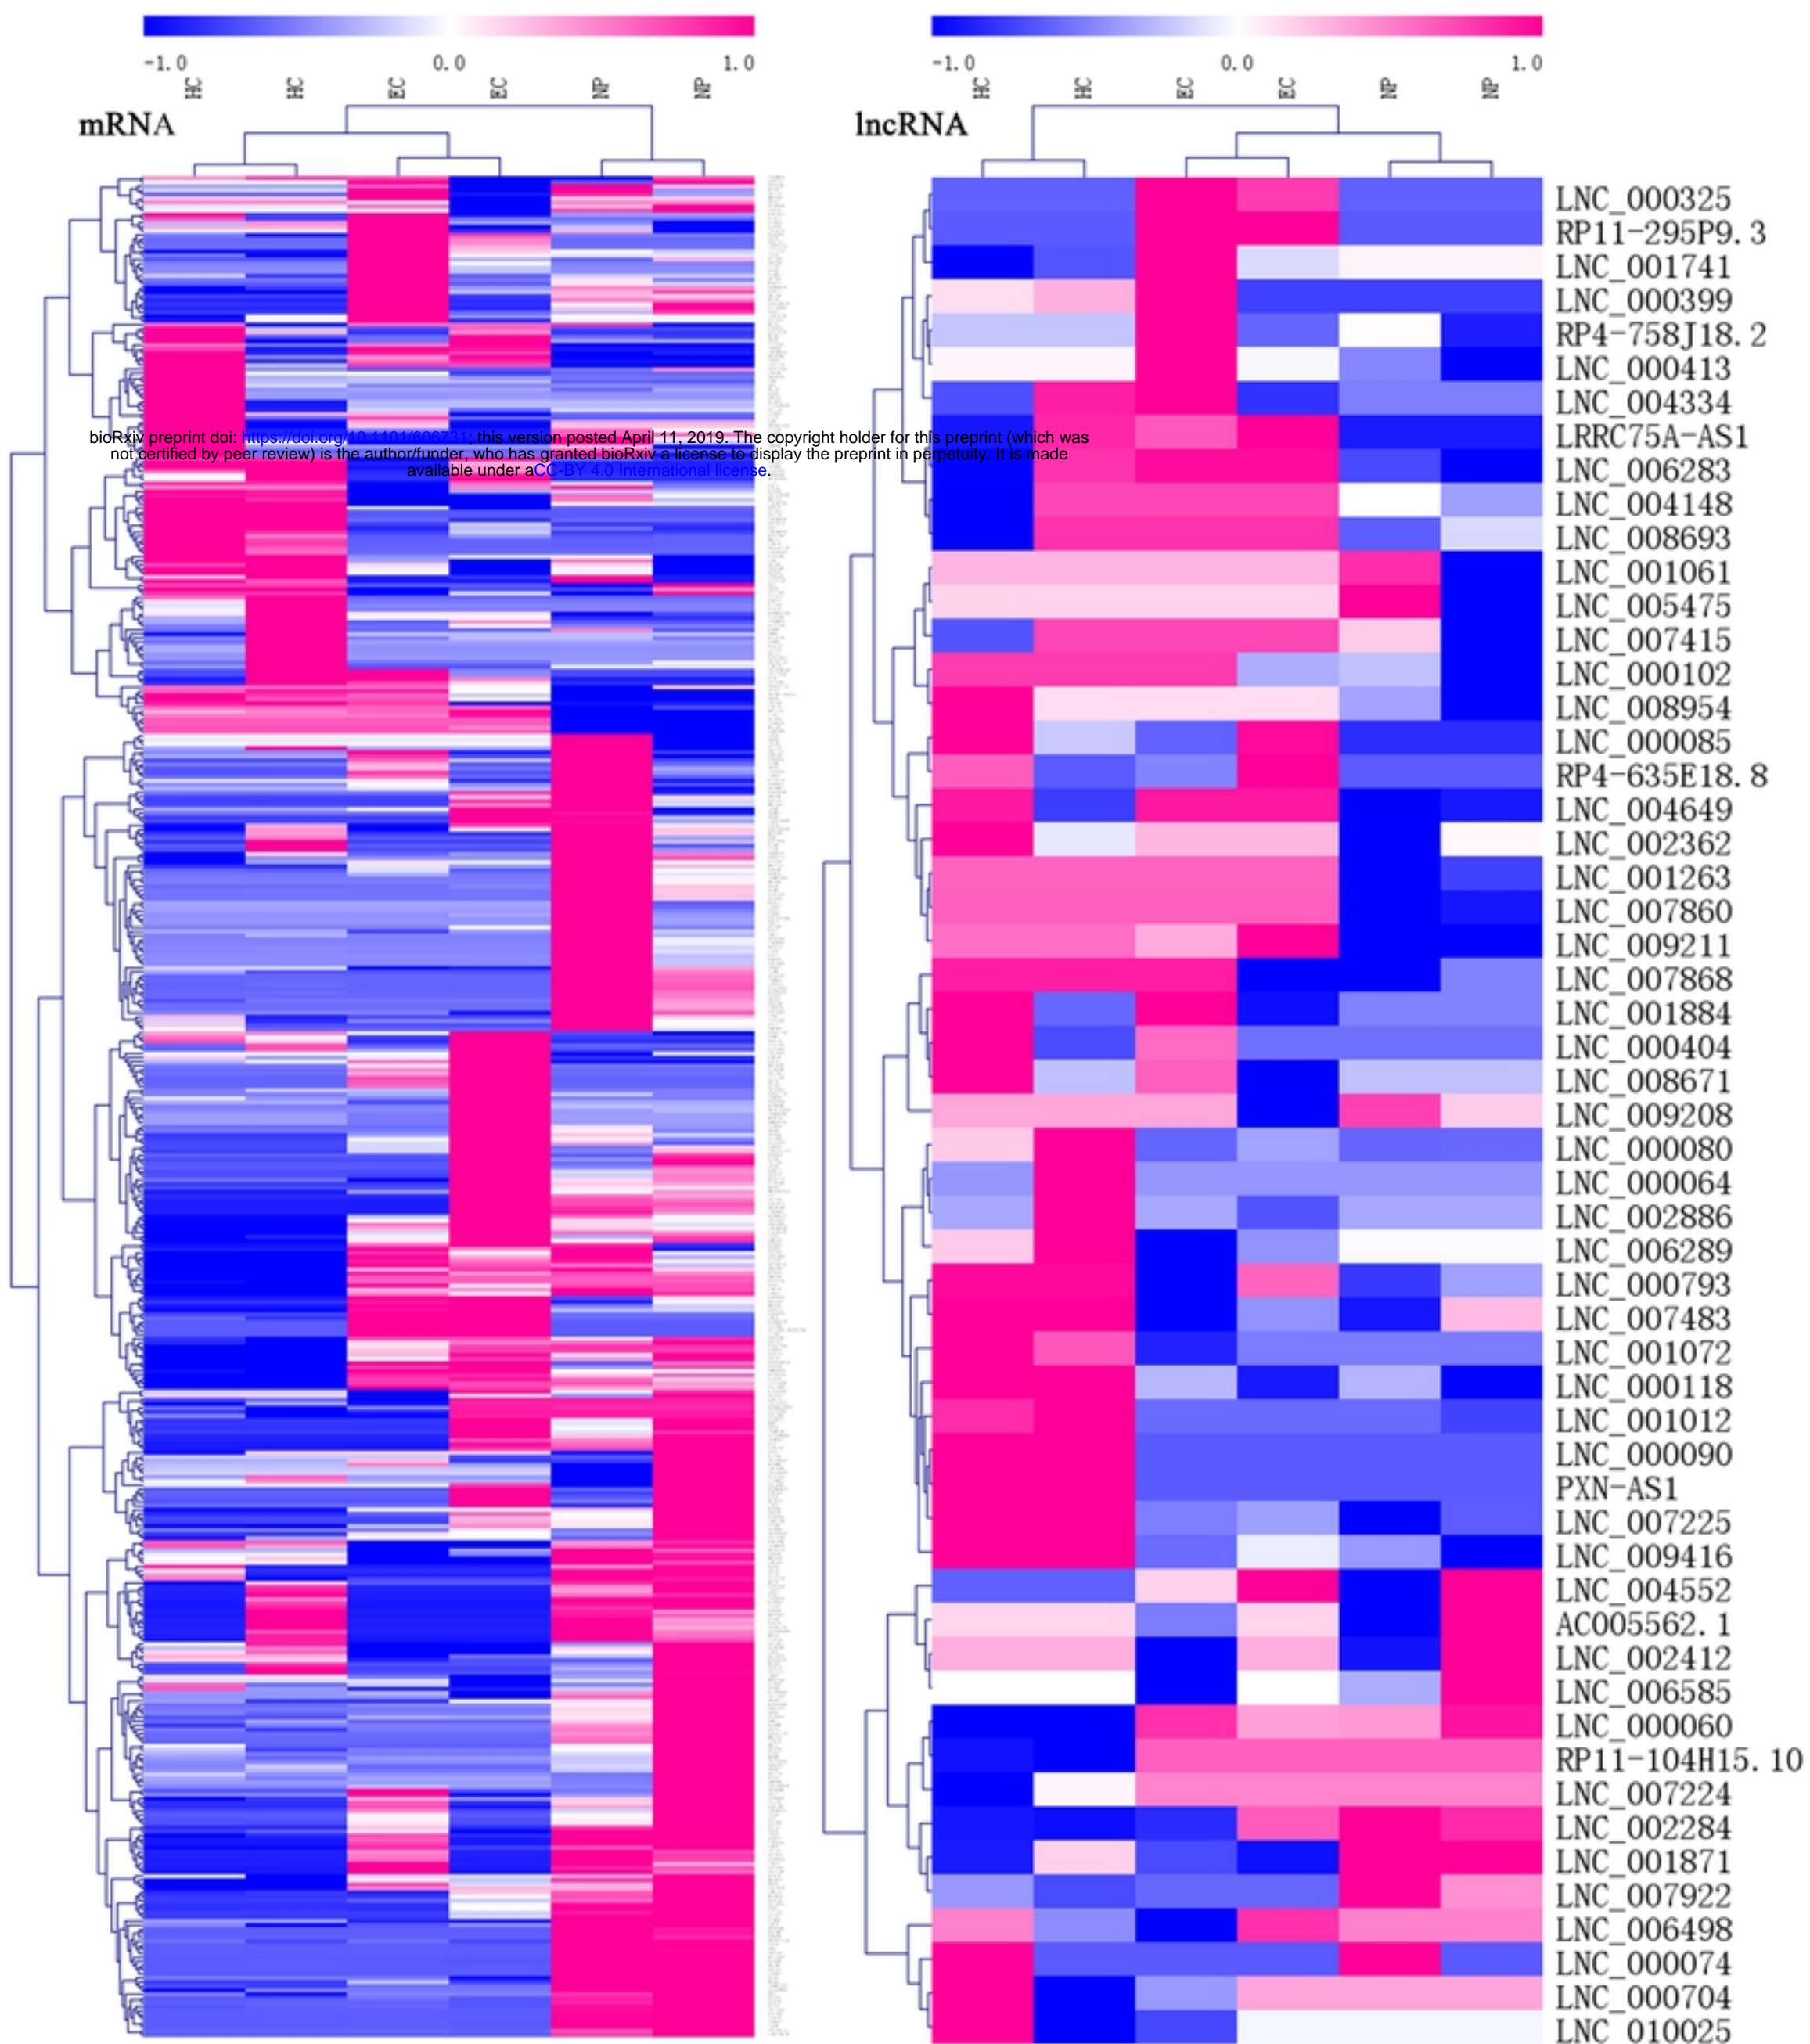

Figure



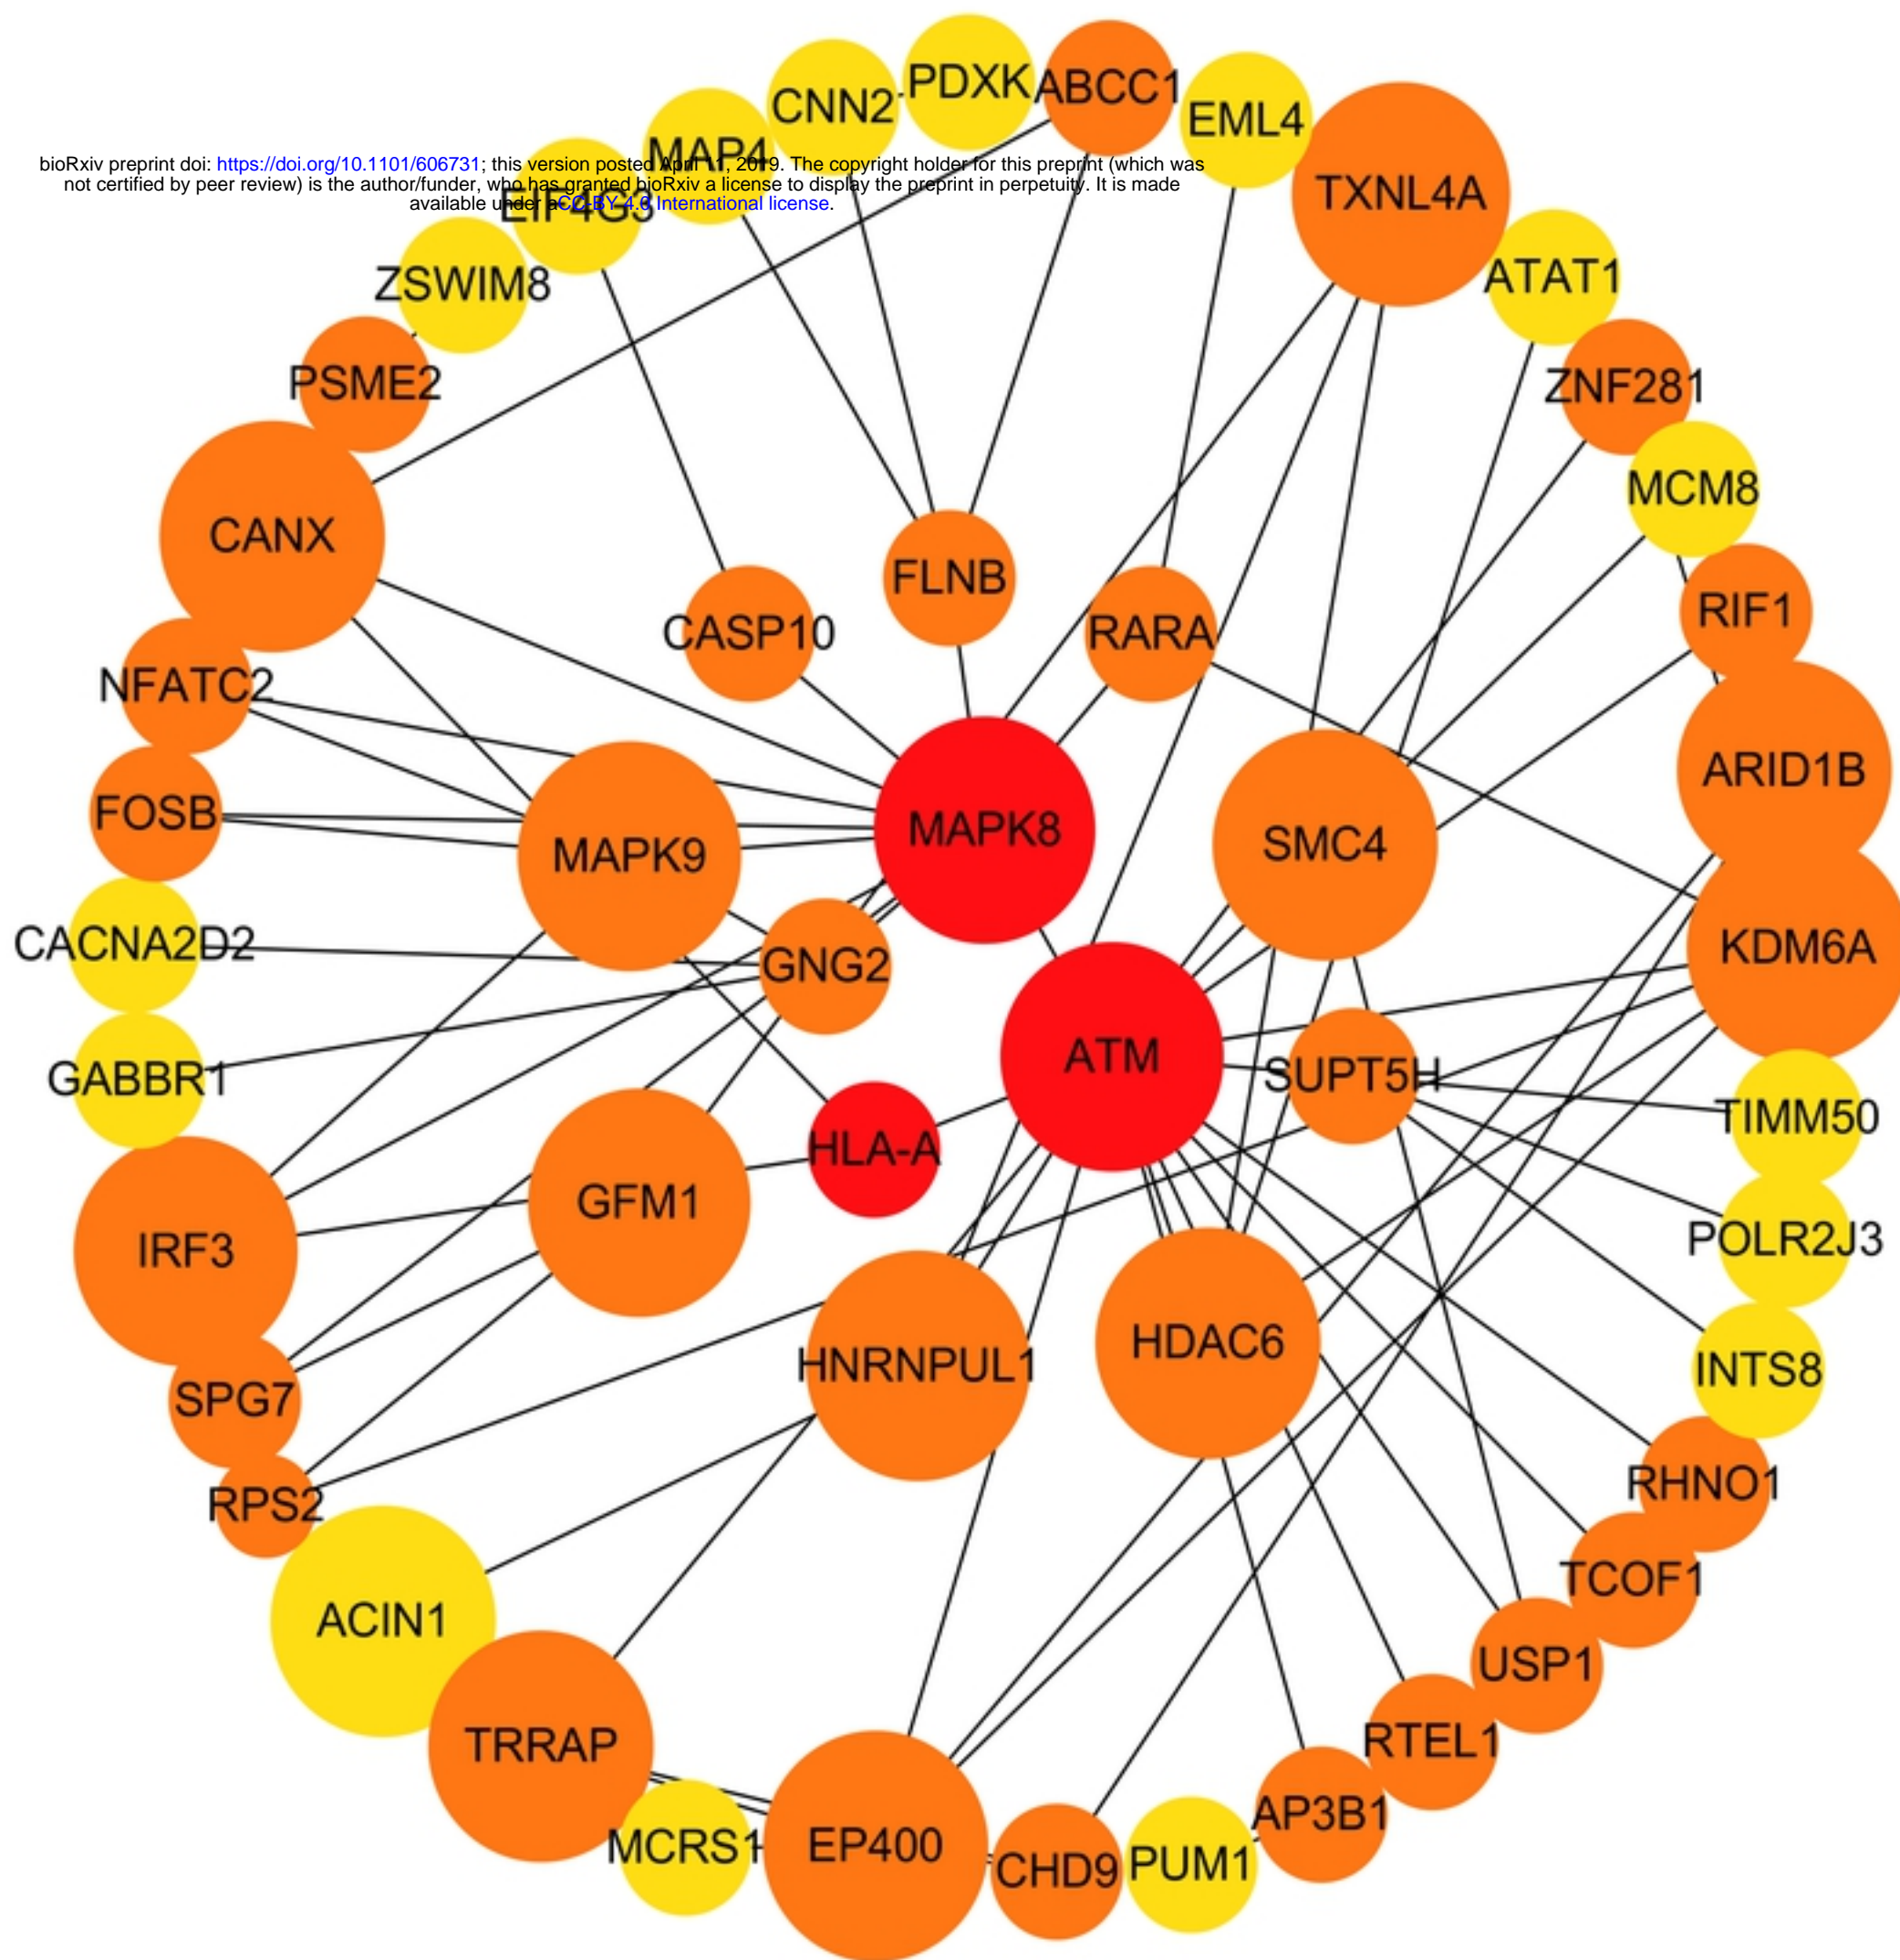

Figure

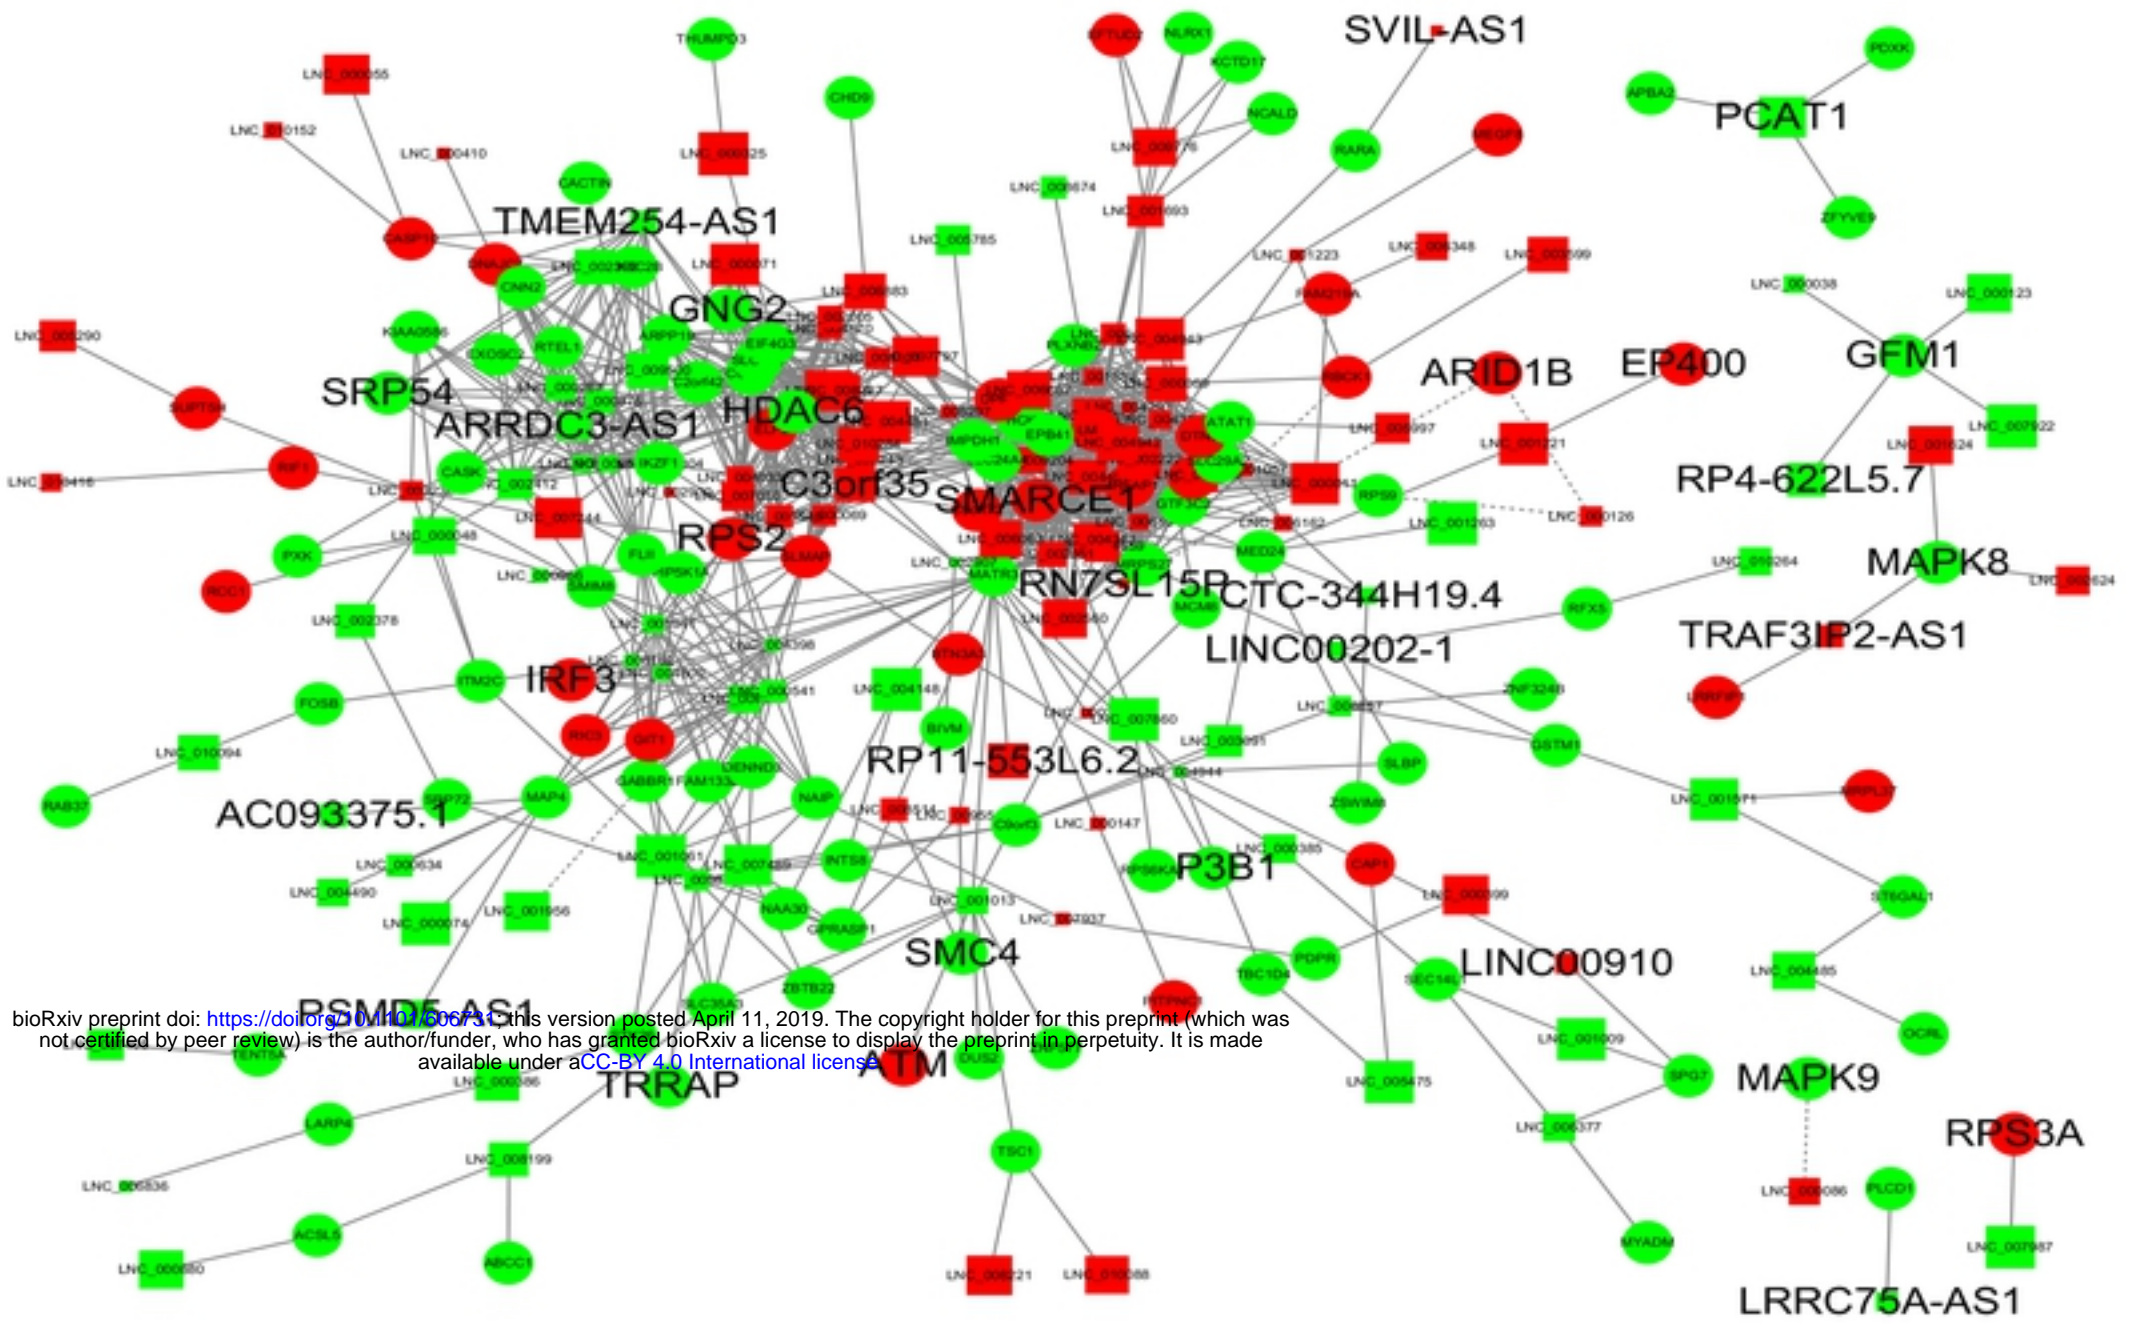

bioRxiv preprint doi: <https://doi.org/10.1101/206731>; this version posted April 11, 2019. The copyright holder for this preprint (which was not certified by peer review) is the author/funder, who has granted bioRxiv a license to display the preprint in perpetuity. It is made available under aCC-BY 4.0 International license.

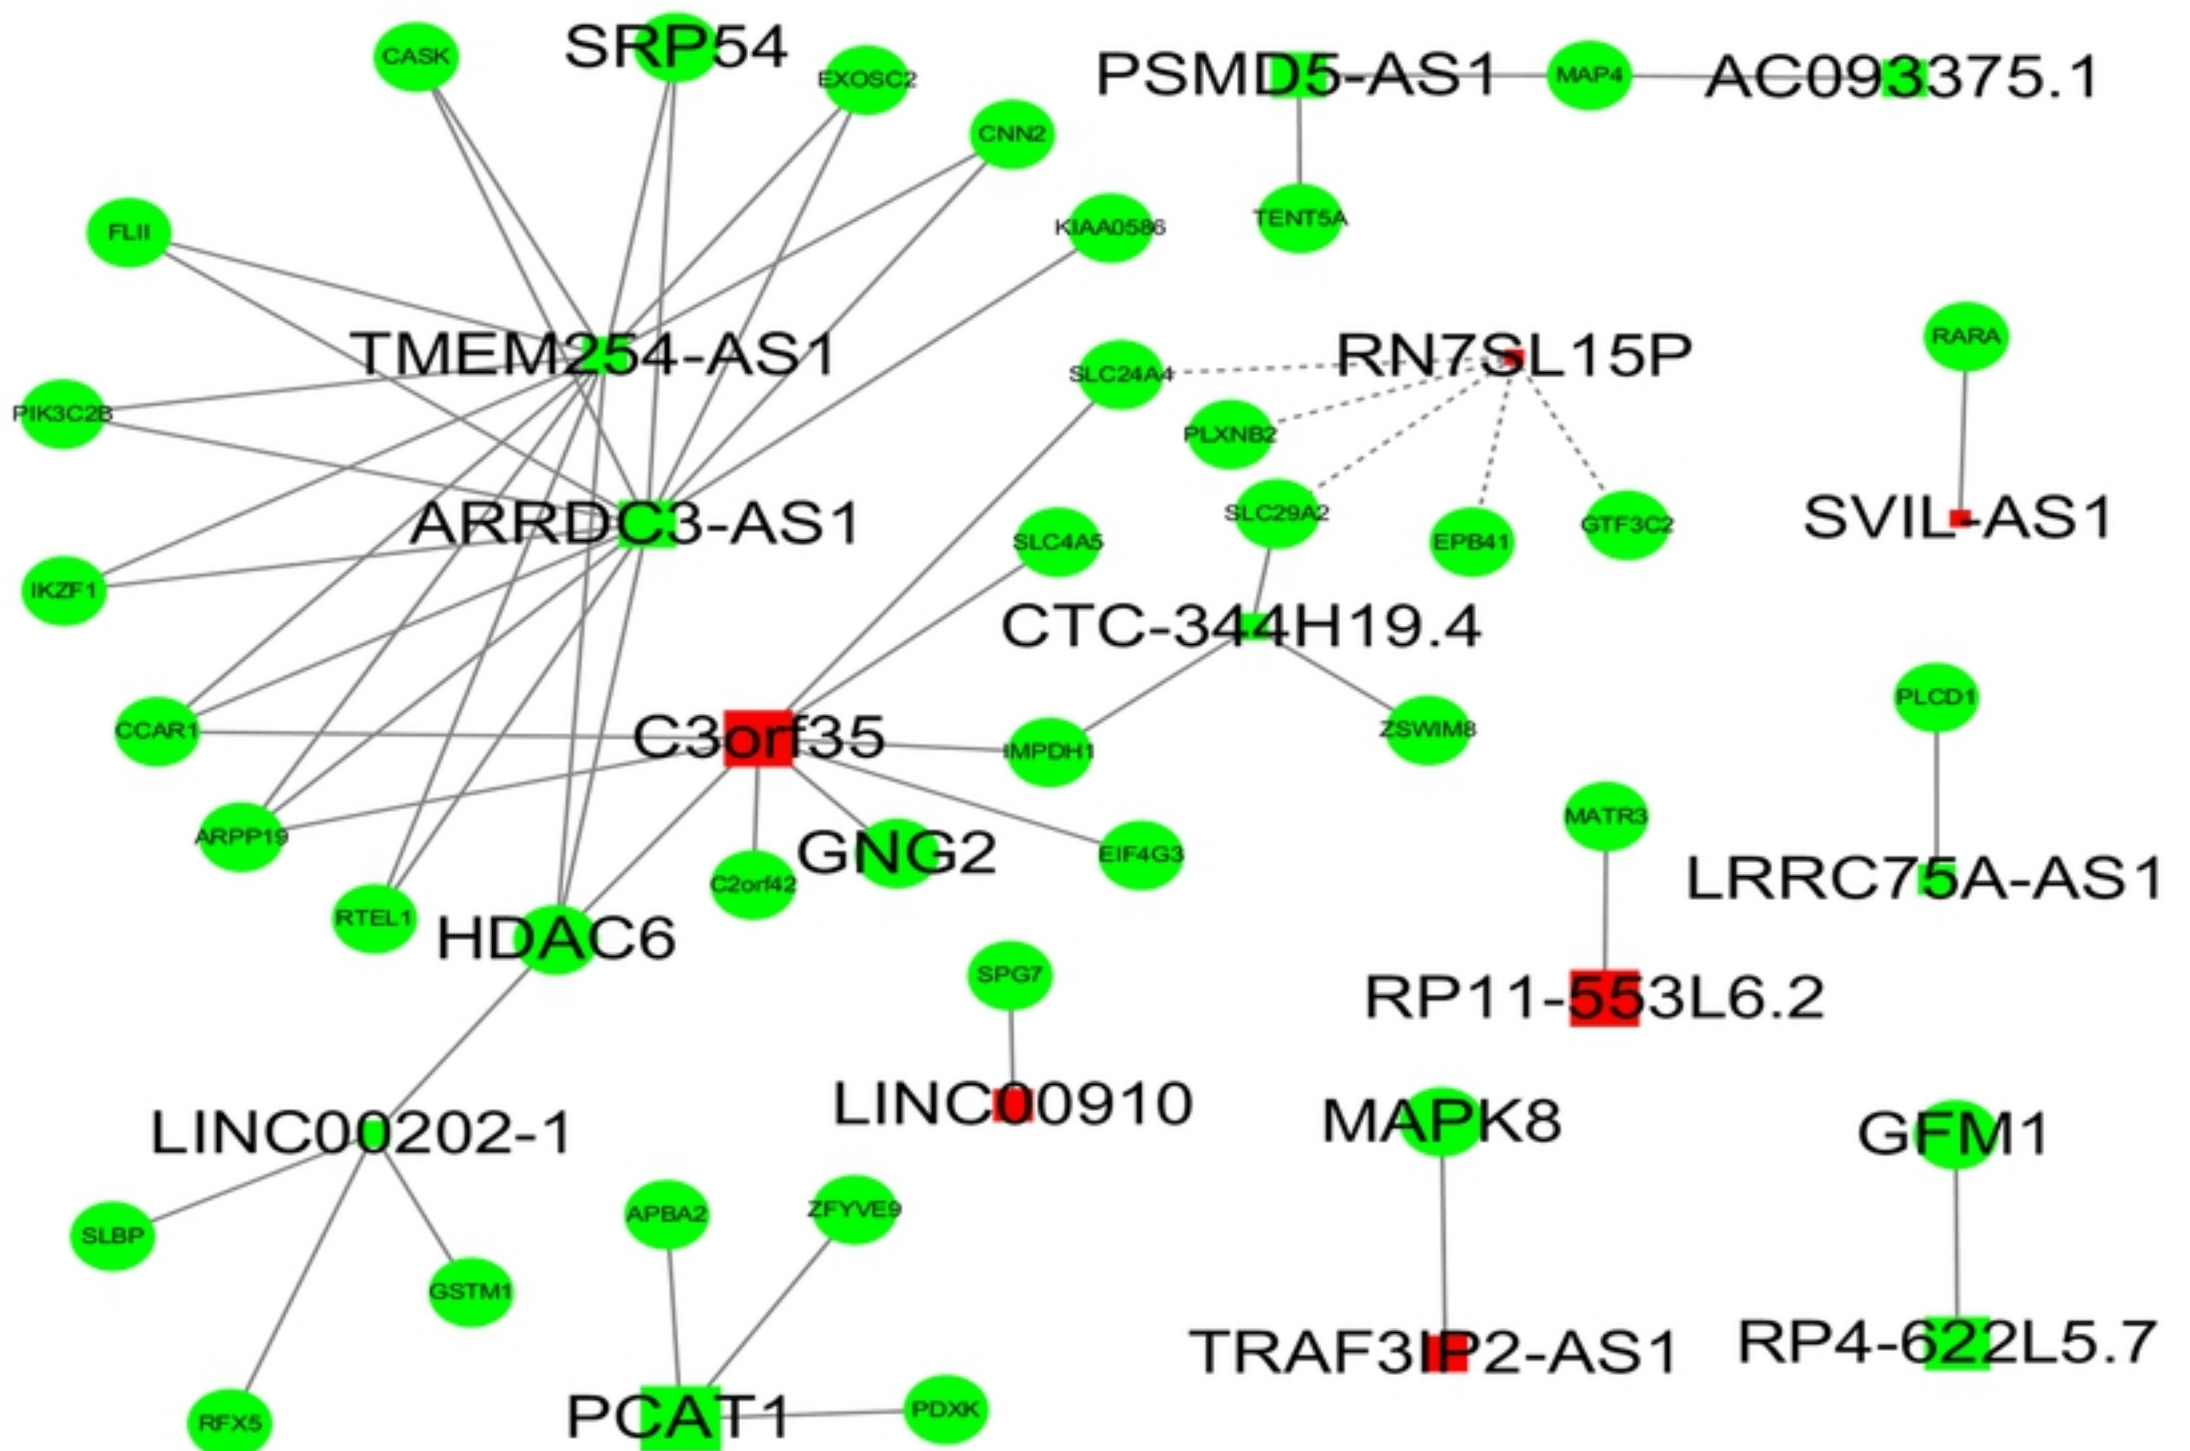

Figure

## GO Terms

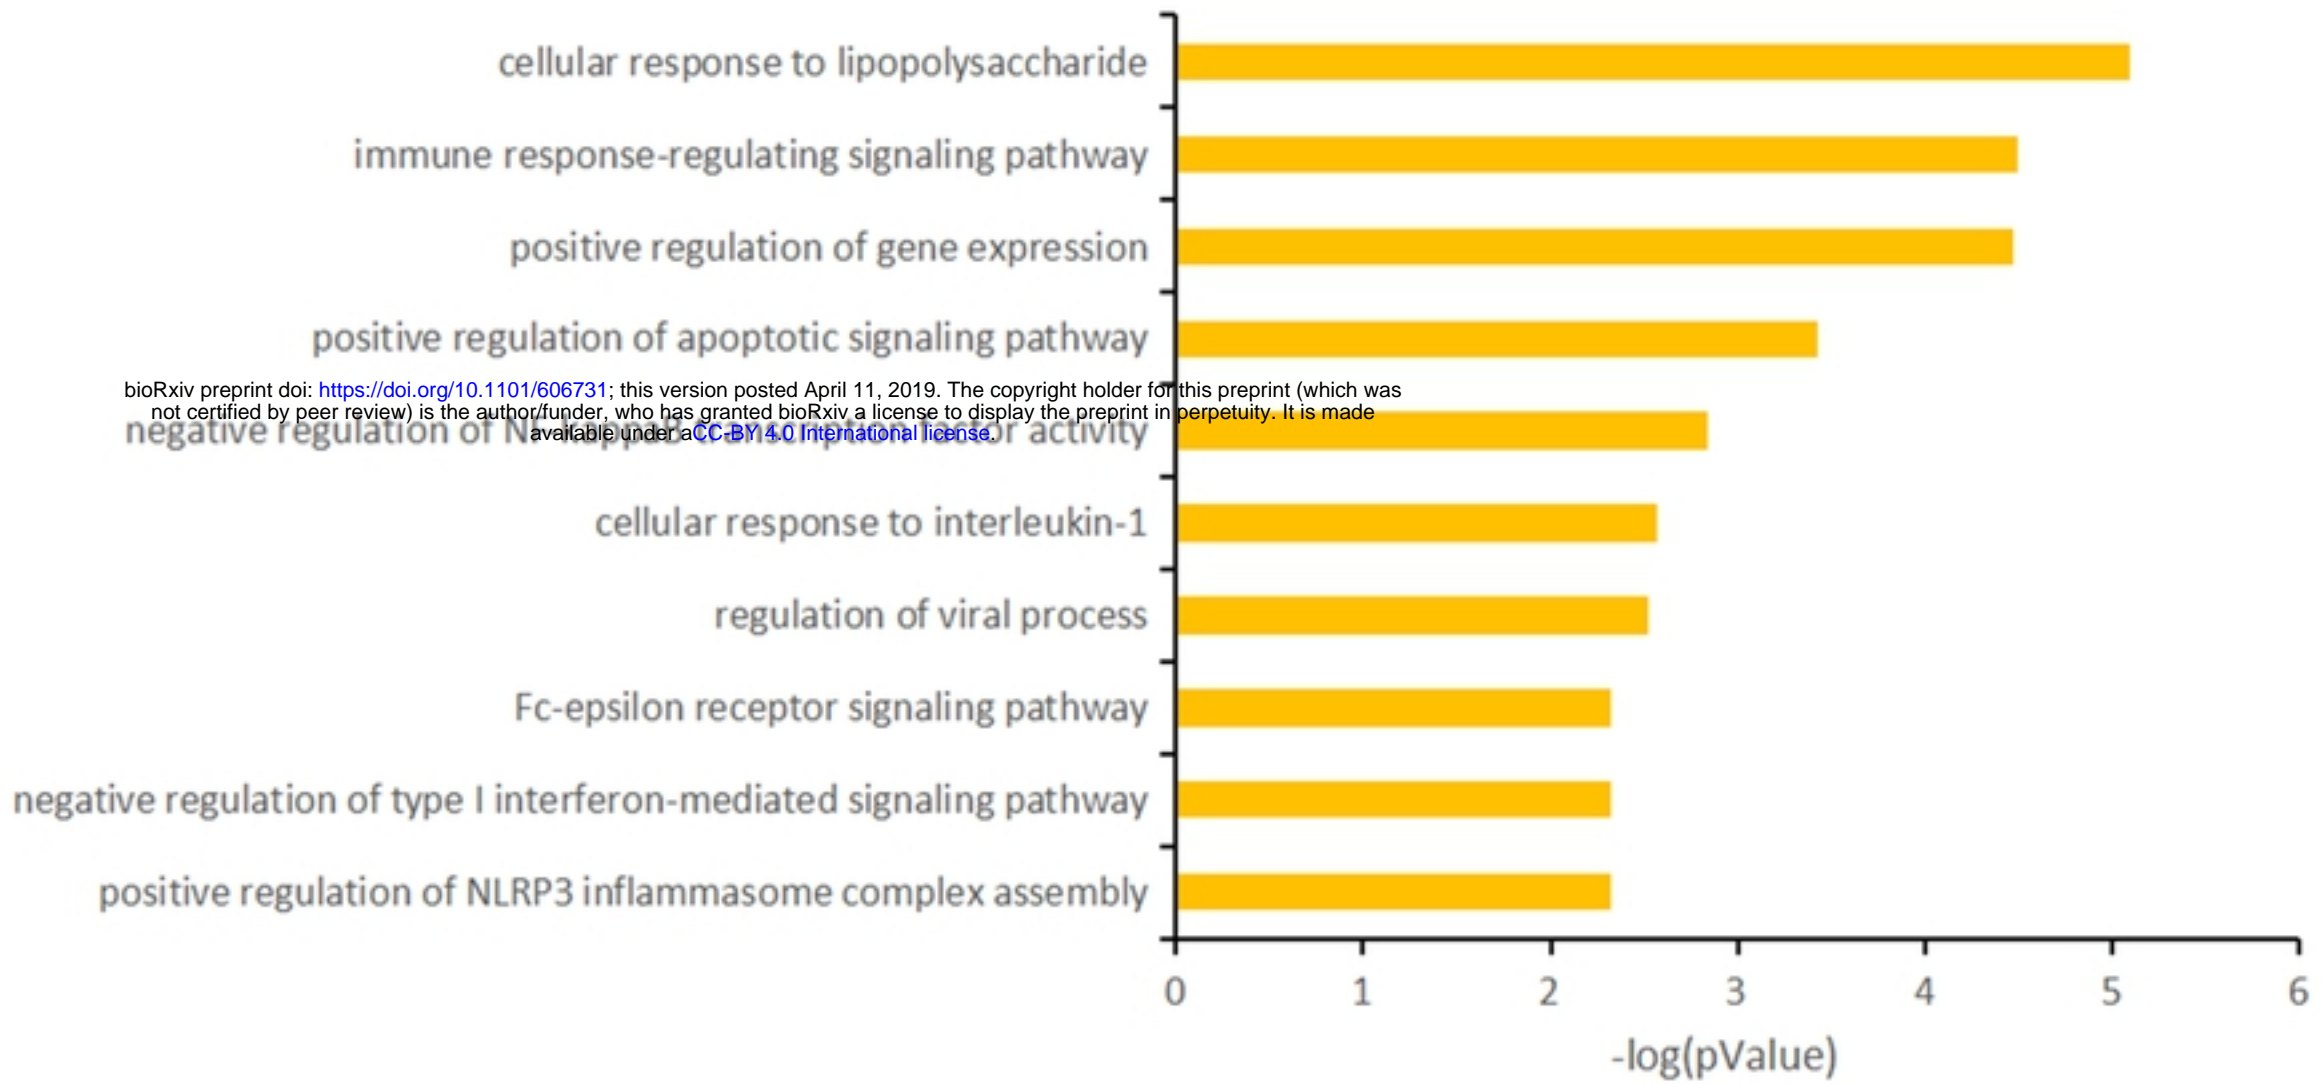

## KEGG Pathways

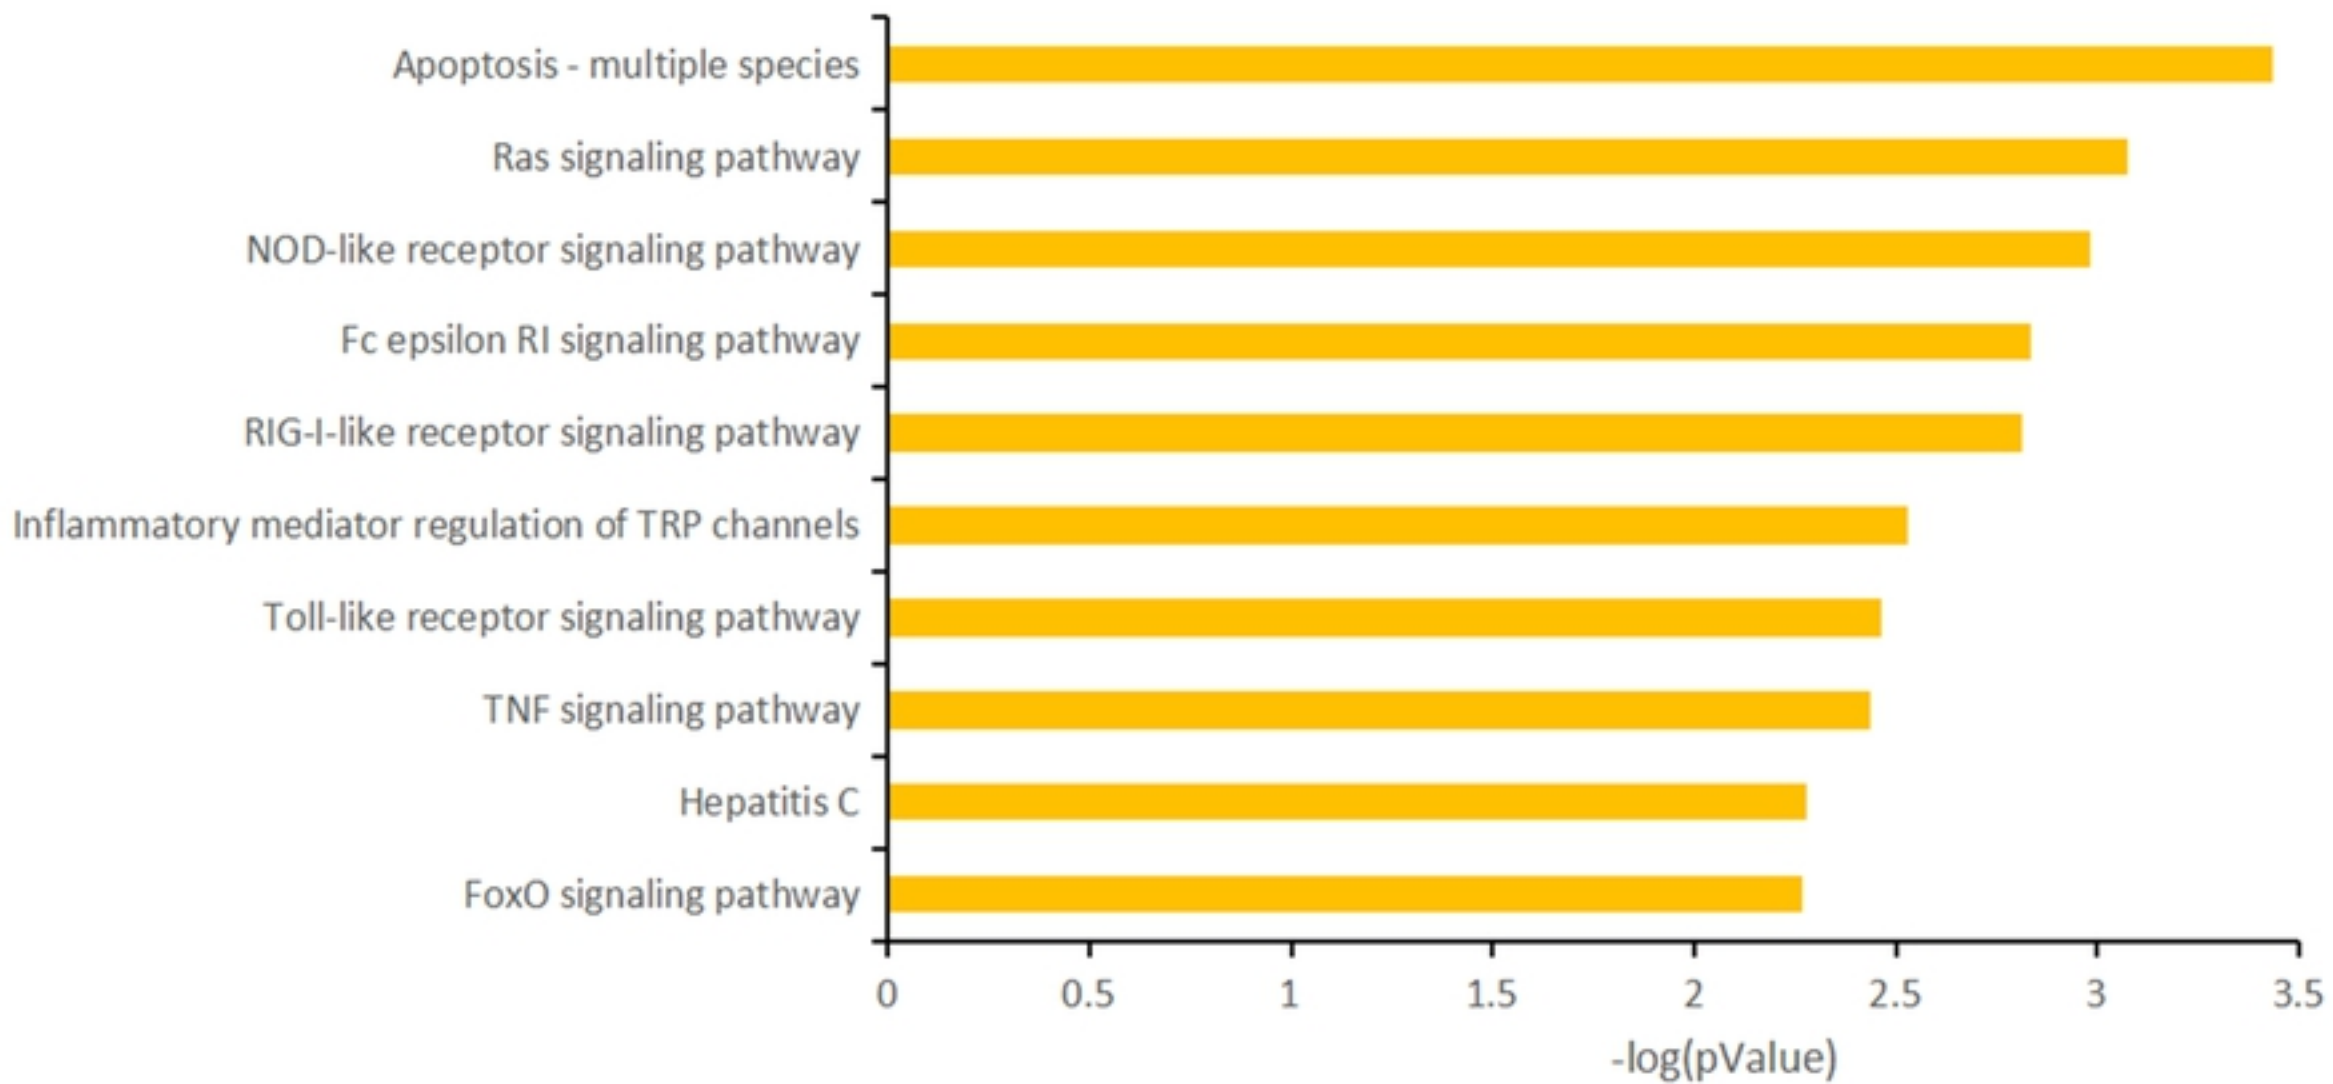

Source: https://www.biorxiv.org/content/10.1101/606731v1.full.pdf
